# Supplementary material for: Prevalence and Molecular Epidemiology of Staphylococcus aureus among Residents of Seven Nursing Homes in Shanghai
Source: PLoS One. 2015 Sep 4;10(9):e0137593. doi: 10.1371/journal.pone.0137593 (PMC4560451; doi:10.1371/journal.pone.0137593)
Supplement: S1 Table — (XLSX) [file pone.0137593.s001.xlsx]

## Sheet: Sheet1
Resident No.	Isolate No.	Gender	Age	Sample Type	ST	spa type	mecA	SCCmec	pvl	tst	eta	etb	sea	seb	sec	sed	see	seg	seh	sei	sej	sasX
1	BS0001	F	73	nasal	398	t034	0		0	0	0	0	0	0	0	0	0	0	0	0	0	0
1	YS0001	F	73	axillary	398	t034	0		0	0	0	0	0	0	0	0	0	0	0	0	0	0
1	PS0001	F	73	skin	398	t034	0		0	0	0	0	0	0	0	0	0	0	0	0	0	0
2	BS0002	F	76	nasal	398	t034	0		0	0	0	0	0	0	0	0	0	0	0	0	0	0
5	BS0005	F	85	nasal	7	t091	0		0	0	0	0	0	0	0	0	0	0	0	0	0	0
5	YS0005	F	85	axillary	398	t034	0		0	0	0	0	0	0	0	0	0	0	0	0	0	0
11	PS0011	M	82	skin	7	t091	0		0	0	0	0	0	0	0	0	0	0	0	0	0	0
16	BS0016	M	58	nasal	6	t304	0		0	0	1	0	1	0	0	0	0	0	0	0	0	0
16	YS0016	M	58	axillary	6	t304	0		0	0	1	0	1	0	0	0	0	0	0	0	0	0
17	BS0017	M	79	nasal	7	t091	0		0	0	0	0	0	0	0	0	0	0	0	0	0	0
19	BS0019	F	84	nasal	398	t14383	1	Ⅴ	0	0	0	0	0	0	0	0	0	0	0	0	0	0
19	YS0019	F	84	axillary	398	t14383	1	Ⅴ	0	0	0	0	0	0	0	0	0	0	0	0	0	0
19	PS0019	F	84	skin	398	t14383	1	Ⅴ	0	0	0	0	0	0	0	0	0	0	0	0	0	0
25	BS0025	F	62	nasal	398	t14383	1	Ⅴ	0	0	0	0	0	0	0	0	0	0	0	0	0	0
26	PS0026	F	91	skin	398	t14383	1	Ⅴ	0	1	0	0	0	0	0	0	0	0	0	0	0	0
27	PS0027	F	58	skin	398	t034	0		0	1	0	0	0	0	0	0	0	0	0	0	0	0
28	BS0028	F	70	nasal	398	t14383	1	Ⅴ	0	0	0	0	0	0	0	0	0	0	0	0	0	0
30	YS0030	F	86	axillary	398	t034	0		0	0	0	0	0	0	0	0	0	0	0	0	0	0
32	YS0032	F	81	axillary	5	t002	1	Ⅱ	0	0	0	0	0	0	0	0	0	0	0	0	0	0
35	BS0035	F	81	nasal	398	t14383	1	Ⅴ	0	0	0	0	0	0	0	0	0	0	0	0	0	0
38	BS0038	F	84	nasal	764	t311	1	Ⅱ	0	0	0	0	0	1	0	0	0	1	0	1	0	0
39	BS0039	F	85	nasal	398	t14383	1	Ⅴ	0	0	0	0	0	0	0	0	0	0	0	0	0	0
39	YS0039	F	85	axillary	398	t14383	1	Ⅴ	0	0	0	0	0	0	0	0	0	0	0	0	0	0
39	PS0039	F	85	skin	398	t14383	1	Ⅴ	0	0	0	0	0	0	0	0	0	0	0	0	0	0
40	BS0040	F	79	nasal	398	t14383	1	Ⅴ	0	0	0	0	0	0	0	0	0	0	0	0	0	0
41	BS0041	F	84	nasal	1	t127	0		0	0	0	0	0	0	1	0	0	0	1	0	0	0
43	BS0043	M	76	nasal	1	t127	0		0	0	0	0	1	0	0	0	0	0	1	0	0	0
43	YS0043	M	76	axillary	188	t189	0		0	0	0	0	0	1	0	0	0	0	0	0	0	0
43	PS0043	M	76	skin	188	t189	0		0	0	0	0	0	1	0	0	0	0	0	0	0	0
44	BS0044	M	81	nasal	7	t091	0		0	0	0	0	1	0	0	0	0	0	0	0	0	0
44	YS0044	M	81	axillary	1	t14384	1	Ⅳ	0	0	0	0	1	0	1	0	0	0	1	0	0	0
44	PS0044	M	81	skin	1	t127	0		0	0	0	0	0	0	0	0	0	0	0	0	0	0
46	BS0046	F	79	nasal	1	t127	0		0	0	0	0	1	0	0	0	0	0	1	0	0	0
50	BS0050	F	85	nasal	1	t127	0		0	0	0	0	1	0	0	0	0	0	1	0	0	0
51	BS0051	M	93	nasal	59	t3401	1	Ⅳ	0	0	0	0	0	1	0	0	0	0	0	0	0	0
53	BS0053	M	74	nasal	6	t304	0		0	0	1	0	1	0	0	0	0	0	0	0	0	0
62	YS0062	F	93	axillary	1	t14384	1	Ⅳ	0	0	0	0	1	0	1	0	0	0	1	0	0	0
62	PS0062	F	93	skin	1	t14384	1	Ⅳ	0	0	0	0	1	0	1	0	0	0	1	0	0	0
63	BS0063	F	56	nasal	398	t14383	1	Ⅴ	0	0	0	0	0	0	0	0	0	0	0	0	0	0
64	BS0064	F	83	nasal	398	t14383	1	Ⅴ	0	0	0	0	0	0	0	0	0	0	0	0	0	0
64	PS0064	F	83	skin	398	t14383	1	Ⅴ	0	0	0	0	0	0	0	0	0	0	0	0	0	0
65	BS0065	F	85	nasal	398	t14383	1	Ⅴ	0	0	0	0	0	0	0	0	0	0	0	0	0	0
65	YS0065	F	85	axillary	398	t14383	1	Ⅴ	0	0	0	0	0	0	0	0	0	0	0	0	0	0
65	PS0065	F	85	skin	398	t14383	1	Ⅴ	0	0	0	0	0	0	0	0	0	0	0	0	0	0
66	BS0066	F	84	nasal	1	t127	0		0	0	0	0	1	0	0	0	0	0	1	0	0	0
67	YS0067	F	91	axillary	1	t14384	1	Ⅳ	0	0	0	0	1	0	1	0	0	0	1	0	0	0
68	PS0068	F	59	skin	1	t14384	1	Ⅳ	0	0	0	0	1	0	1	0	0	0	1	0	0	0
69	YS0069	F	89	axillary	5	t002	1	Ⅱ	0	0	0	0	0	0	0	0	0	0	0	1	0	0
83	BS0083	F	82	nasal	5	t002	1	Ⅱ	0	0	0	0	0	1	0	0	0	1	0	1	0	0
85	BS0085	F	83	nasal	NT	NT	1	Ⅴ	0	0	0	0	0	0	0	0	0	1	0	1	0	0
87	BS0087	M	81	nasal	NT	NT	1	Ⅴ	0	0	0	0	0	0	0	0	0	1	0	1	0	0
88	BS0088	F	92	nasal	239	t037	1	Ⅴ	0	0	0	0	0	0	0	0	0	0	0	0	0	0
91	BS0091	F	81	nasal	1	t127	0		0	0	0	0	0	0	1	0	0	0	1	0	0	0
98	BS0098	F	84	nasal	88	t4333	0		1	0	0	0	0	0	0	0	0	0	0	0	0	0
105	BS0105	F	91	nasal	1462	t8275	0		0	0	0	0	0	1	0	0	0	0	0	0	0	0
105	YS0105	F	91	axillary	1462	t8275	0		0	0	0	0	0	1	0	0	0	0	0	0	0	0
105	PS0105	F	91	skin	1462	t8275	0		0	0	0	0	0	0	0	0	0	0	0	0	0	0
106	BS0106	F	79	nasal	5	t002	1	Ⅱ	0	0	0	0	0	1	0	0	0	1	0	1	0	0
107	BS0107	M	80	nasal	25	t078	0		0	0	0	0	0	1	0	0	0	1	0	1	0	0
136	BS0136	M	85	nasal	188	t189	0		0	0	0	0	0	1	0	0	0	0	0	0	0	0
137	BS0137	M	68	nasal	7	t091	0		0	0	0	0	0	0	0	0	0	0	0	0	0	0
140	BS0140	M	72	nasal	6	t2467	0		0	0	1	0	1	0	0	0	0	0	0	0	0	0
142	BS0142	F	80	nasal	1462	t8275	0		0	0	0	0	0	1	0	0	0	0	0	0	0	0
144	YS0144	F	87	axillary	6	t2467	0		0	0	1	0	1	0	0	0	0	0	0	0	0	0
144	PS0144	F	87	skin	6	t2467	0		0	0	1	0	1	0	0	0	0	0	0	0	0	0
147	YS0147	F	90	axillary	1	t127	0		0	0	0	0	0	0	0	0	0	0	0	0	0	0
152	BS0152	F	88	nasal	59	t441	0		0	0	0	0	0	1	0	0	0	0	0	0	0	0
155	BS0155	F	89	nasal	1	t321	1	Ⅰ	0	0	0	0	1	0	1	0	0	0	1	0	0	0
157	BS0157	F	84	nasal	1	t321	1	Ⅰ	0	0	0	0	1	0	1	0	0	0	1	0	0	0
159	BS0159	F	93	nasal	25	t078	0		0	0	0	0	0	1	0	0	0	1	0	0	0	0
163	BS0163	M	76	nasal	7	t091	0		0	0	0	0	0	0	0	0	0	0	0	0	0	0
169	BS0169	F	90	nasal	1	t127	1	Ⅳ	0	0	0	0	1	0	1	0	0	0	1	0	0	0
190	BS0190	F	83	nasal	25	t078	0		0	0	0	0	0	1	0	0	0	1	0	1	0	0
194	BS0194	F	84	nasal	1462	t8275	0		0	0	0	0	0	1	0	0	0	0	0	0	0	0
197	PS0197	M	81	skin	1	t127	1	Ⅳ	0	0	0	0	0	0	1	0	0	0	1	0	0	0
207	BS0207	F	86	nasal	398	t034	1	Ⅴ	0	0	0	0	0	0	0	0	0	0	0	0	0	0
207	YS0207	F	86	axillary	398	t034	1	Ⅴ	0	0	0	0	0	0	0	0	0	0	0	0	0	0
207	PS0207	F	86	skin	398	t034	1	Ⅴ	0	0	0	0	0	0	0	0	0	0	0	0	0	0
221	BS0221	F	80	nasal	1	t127	0		0	0	0	0	1	0	1	0	0	0	0	0	0	0
221	YS0221	F	80	axillary	1	t127	0		0	0	0	0	1	0	1	0	0	0	1	0	0	0
224	BS0224	M	84	nasal	7	t091	0		0	0	0	0	0	0	0	0	0	0	0	0	0	0
225	PS0225	M	79	skin	7	t2616	0		0	0	0	0	0	0	0	0	0	0	0	0	0	0
226	YS0226	M	81	axillary	7	t2616	0		0	0	0	0	0	0	0	0	0	0	0	0	0	0
228	BS0228	F	78	nasal	188	t2883	0		0	0	0	0	0	0	0	0	0	0	0	0	0	0
243	BS0243	F	86	nasal	573	t14385	0		0	0	0	0	0	0	1	0	0	1	0	1	0	0
255	PS0255	F	89	skin	1281	t164	0		0	0	0	0	0	0	0	0	0	0	0	1	0	0
262	BS0262	F	92	nasal	630	t11041	0		0	0	0	0	0	0	0	0	0	0	0	0	0	0
267	BS0267	F	85	nasal	630	t11041	0		0	0	0	0	0	0	0	0	0	0	0	0	0	0
271	BS0271	F	85	nasal	630	t11041	0		0	0	0	0	0	0	0	0	0	0	0	0	0	0
273	BS0273	F	88	nasal	5	t002	0		0	0	0	0	0	0	1	1	0	1	0	1	1	0
277	BS0277	F	90	nasal	630	t11041	0		0	0	0	0	0	0	0	0	0	0	0	0	0	0
301	BS0301	F	86	nasal	5	t002	1	Ⅱ	0	1	0	0	0	0	0	0	0	1	0	1	0	0
301	YS0301	F	86	axillary	5	t002	1	Ⅱ	0	1	0	0	0	0	0	0	0	0	0	1	0	0
302	BS0302	F	94	nasal	5	t002	1	Ⅱ	0	1	0	0	0	0	1	0	0	1	0	1	0	0
309	BS0309	F	85	nasal	5	t688	1	Ⅱ	0	1	0	0	0	0	1	0	0	1	0	1	0	0
312	BS0312	F	87	nasal	1	t127	1	Ⅳ	0	0	0	0	0	0	1	0	0	0	1	0	0	0
316	BS0316	M	82	nasal	15	t803	0		0	0	0	0	0	0	0	0	0	0	0	0	0	0
317	BS0317	M	82	nasal	188	t3887	0		0	0	0	0	0	1	0	0	0	0	0	0	0	0
336	BS0336	F	89	nasal	1	t127	1	Ⅳ	0	0	0	0	1	0	1	0	0	0	1	0	0	0
337	YS0337	F	81	axillary	5	t002	1	Ⅱ	0	0	0	0	0	0	1	0	0	1	0	1	0	0
337	PS0337	F	81	skin	1	t127	1	Ⅳ	0	0	0	0	1	0	1	0	0	0	1	0	0	0
344	BS0344	F	78	nasal	5	t002	1	Ⅱ	0	1	0	0	0	0	1	0	0	1	0	1	0	0
344	YS0344	F	78	axillary	5	t002	1	Ⅱ	0	0	0	0	0	0	1	0	0	0	0	1	0	0
350	BS0350	F	91	nasal	188	t189	0		0	0	0	0	0	0	0	0	0	0	0	0	0	0
350	YS0350	F	91	axillary	188	t189	0		0	0	0	0	0	1	0	0	0	0	0	0	0	0
350	PS0350	F	91	skin	188	t189	0		0	0	0	0	0	0	0	0	0	0	0	0	0	0
360	BS0360	F	79	nasal	188	t189	0		0	0	0	0	0	1	0	0	0	0	0	0	0	0
361	BS0361	F	85	nasal	188	t189	0		0	0	0	0	0	1	0	0	0	0	0	0	0	0
361	YS0361	F	85	axillary	188	t189	0		0	0	0	0	0	1	0	0	0	0	0	0	0	0
365	BS0365	M	87	nasal	5	t688	0		0	0	0	0	0	0	0	1	0	0	0	1	1	0
371	BS0371	F	81	nasal	2315	t11687	0		0	0	0	0	0	0	1	0	0	1	0	1	0	0
371	YS0371	F	81	axillary	2315	t11687	0		0	0	0	0	0	0	1	0	0	1	0	1	0	0
374	BS0374	F	79	nasal	1	t127	1	Ⅳ	0	0	0	0	0	0	0	0	0	0	1	0	0	0
377	BS0377	F	95	nasal	188	t189	0		0	0	0	0	0	0	0	0	0	0	0	0	0	0
379	BS0379	F	82	nasal	1	t127	0		0	0	0	0	1	0	1	0	0	0	1	0	0	0
389	BS0389	F	82	nasal	5	t002	1	Ⅱ	0	1	0	0	0	0	0	0	0	0	0	1	0	0
390	BS0390	F	85	nasal	5	t002	1	Ⅱ	0	1	0	0	0	0	1	0	0	1	0	1	0	0
395	BS0395	F	84	nasal	1	t127	1	Ⅳ	0	0	0	0	0	0	1	0	0	0	1	0	0	0
408	BS0408	F	83	nasal	1	t127	1	Ⅳ	0	0	0	0	1	0	1	0	0	0	1	0	0	0
419	BS0419	F	96	nasal	1	t127	1	Ⅳ	0	0	0	0	1	0	1	0	0	0	1	0	0	0
421	BS0421	M	82	nasal	1	t127	0		0	0	0	0	1	0	1	0	0	0	1	0	0	0
423	BS0423	M	84	nasal	1	t127	1	Ⅳ	0	0	0	0	1	0	1	0	0	0	1	0	0	0
424	YS0424	M	84	axillary	1	t127	0		0	0	0	0	0	0	1	0	0	0	1	0	0	0
431	BS0431	F	78	nasal	1	t127	1	Ⅳ	0	0	0	0	1	0	1	0	0	0	1	0	0	0
435	PS0435	F	79	skin	1	t127	1	Ⅳ	0	0	0	0	0	0	1	0	0	0	1	0	0	0
455	BS0455	F	90	nasal	72	t148	0		0	1	0	0	0	0	1	0	0	1	0	1	0	0
456	BS0456	F	80	nasal	5	t002	1	Ⅱ	0	1	0	0	0	0	1	0	0	1	0	1	0	0
458	YS0458	F	68	axillary	5	t002	1	Ⅱ	0	0	0	0	0	1	0	0	0	0	0	1	0	0
460	BS0460	F	85	nasal	188	t189	0		0	0	0	0	0	1	0	0	0	0	0	0	0	0
464	BS0464	F	89	nasal	7	t091	0		0	0	0	0	0	0	0	0	0	0	0	0	0	0
468	BS0468	F	90	nasal	188	t189	0		0	0	0	0	0	0	0	0	0	0	0	0	0	0
471	BS0471	F	85	nasal	1	t127	1	Ⅳ	0	0	0	0	1	0	1	0	0	0	1	0	0	0
478	BS0478	F	86	nasal	59	t437	1	Ⅴ	1	0	0	0	0	1	0	0	0	0	0	0	0	0
478	YS0478	F	86	axillary	59	t437	1	Ⅴ	1	0	0	0	0	1	0	0	0	0	0	0	0	0
487	BS0487	M	81	nasal	1	t127	1	Ⅳ	0	0	0	0	1	0	1	0	0	0	1	0	0	0
488	BS0488	M	75	nasal	7	t091	0		0	0	0	0	0	0	0	0	0	0	0	0	0	0
492	BS0492	F	85	nasal	1	t127	1	Ⅳ	0	0	0	0	1	0	1	0	0	0	1	0	0	0
492	YS0492	F	85	axillary	1	t127	1	Ⅳ	0	0	0	0	1	0	1	0	0	0	1	0	0	0
492	PS0492	F	85	skin	1	t127	1	Ⅳ	0	0	0	0	1	0	1	0	0	0	1	0	0	0
493	BS0493	F	85	nasal	1	t127	1	Ⅳ	0	0	0	0	1	0	1	0	0	0	1	0	0	0
495	BS0495	M	85	nasal	398	t14383	1	Ⅴ	0	0	0	0	0	0	0	0	0	0	0	0	0	0
